# Chk1 and Mps1 jointly regulate correction of merotelic kinetochore attachments

Eleni Petsalaki and George Zachos\*

Department of Biology, University of Crete, Vassilika Vouton, Heraklion 70013, Greece

\*Author for correspondence ([gzachos@biology.uoc.gr](mailto:gzachos@biology.uoc.gr))

Accepted 10 December 2012

Journal of Cell Science 126, 1235–1246

© 2013. Published by The Company of Biologists Ltd

doi: 10.1242/jcs.119677

## Summary

If uncorrected, merotelic kinetochore attachments can induce mis-segregated chromosomes in anaphase. We show that checkpoint kinase 1 (Chk1) protects vertebrate cells against merotelic attachments and lagging chromosomes and is required for correction of merotelic attachments during a prolonged metaphase. Decreased Chk1 activity leads to hyper-stable kinetochore microtubules, unstable binding of MCAK, Kif2b and Mps1 to centromeres or kinetochores and reduced phosphorylation of Hec1 by Aurora-B. Phosphorylation of Aurora-B at serine 331 (Ser331) by Chk1 is high in prometaphase and decreases significantly in metaphase cells. We propose that Ser331 phosphorylation is required for optimal localization of MCAK, Kif2b and Mps1 to centromeres or kinetochores and for Hec1 phosphorylation. Furthermore, inhibition of Mps1 activity diminishes initial recruitment of MCAK and Kif2b to centromeres or kinetochores, impairs Hec1 phosphorylation and exacerbates merotelic attachments in Chk1-deficient cells. We propose that Chk1 and Mps1 jointly regulate Aurora-B, MCAK, Kif2b and Hec1 to correct merotelic attachments. These results suggest a role for Chk1 and Mps1 in error correction.

**Key words:** Chk1, Aurora-B, Mps1, Merotelic, Mitosis

## Introduction

Accurate chromosome segregation during mitosis requires that sister kinetochores attach to microtubules emanating from opposite spindle poles [bipolar attachment or bi-orientation (Cimini, 2008; Tanaka, 2013)]. Merotelic attachments in which a single kinetochore binds to microtubules coming from both poles occur spontaneously in early mitosis and are not detected by the mitotic spindle checkpoint, the mechanism that prevents anaphase onset until all sister kinetochores bi-orient (Cimini, 2008; Tanaka, 2013). If uncorrected before anaphase, merotelic attachments will lead to lagging chromosomes, typically consisting of a single sister chromatid, and can result in chromosome mis-segregation and aneuploidy (Cimini et al., 2001; Cimini et al., 2003).

The chromosomal passenger complex (CPC), comprising Aurora-B kinase, INCENP, Survivin and Borealin, plays a central role in correction of kinetochore mis-attachments (Tanaka, 2013; van der Waal et al., 2012a). Inhibition of Aurora-B activity increases the frequency of merotelic and syntelic attachments, in which sister kinetochores are bound to microtubules coming from the same spindle pole, and leads to hyper-stable kinetochore microtubules (kMTs; Hauf et al., 2003; Cimini et al., 2006; Knowlton et al., 2006). It has been proposed that Aurora-B promotes detachment of incorrectly attached microtubules by phosphorylating kinetochore substrates to promote turnover of kMTs; however, the molecular pathways involved are a matter of active investigation (Cheeseman et al., 2002; Cimini et al., 2006; Pinsky et al., 2006; Akiyoshi et al., 2010).

The microtubule-depolymerising kinesins MCAK and Kif2b destabilize kMTs to correct mis-attachments (Kline-Smith et al.,

2004; Manning et al., 2007; Bakhoum et al., 2009). MCAK localizes to several mitotic structures including spindle poles, centromeres in the absence of tension or kinetochores in the presence of tension (Andrews et al., 2004; Manning et al., 2007). MCAK promotes turnover of kMTs in metaphase cells and depletion of MCAK correlates with chromosome mis-segregation (Kline-Smith et al., 2004; Bakhoum et al., 2009). Furthermore, Aurora-B phosphorylates MCAK to recruit it to centromeres and inhibits its microtubule depolymerization activity (Andrews et al., 2004; Lan et al., 2004; Knowlton et al., 2006; Tanenbaum et al., 2011).

Kif2b localizes to spindle poles, microtubules and kinetochores where it regulates kMT dynamics during prometaphase and Aurora-B promotes localization of Kif2b to kinetochores by an undescribed mechanism (Manning et al., 2007; Bakhoum et al., 2009). However, in metaphase, Kif2b is replaced by the astrin, SKAP and Ska protein complexes at kinetochores to promote kMT stability and chromosome alignment (Manning et al., 2010; Schmidt et al., 2010; Chan et al., 2012).

Furthermore, Aurora-B phosphorylates the kinetochore protein Hec1 on several N-terminal residues including serine 55 (Ser55) and serine 44 (Ser44) to promote detachment of kMTs (DeLuca et al., 2006; DeLuca et al., 2011). Hec1 mediates kMT attachments and expression of non phosphorylatable Hec1 increases merotelic attachments and anaphase lagging chromosomes (Cheeseman et al., 2006; DeLuca et al., 2006). In addition, mitotic Hec1 phosphorylation is high in prometaphase and decreases significantly in metaphase cells (DeLuca et al., 2011).

Checkpoint kinase 1 (Chk1) is a well established component in the DNA damage and DNA replication pathways (Smith et al.,

2010). Chk1 is also required for optimal chromosome segregation and for spindle checkpoint signalling during unperturbed mitosis or treatment of cells with taxol (Zachos et al., 2007; Peddibhotla et al., 2009). Chk1 phosphorylates Aurora-B at Ser331 to induce Aurora-B kinase activity; however, a role for Chk1 in error correction has not been previously reported (Petsalaki et al., 2011).

Mps1 kinase is required for mitotic arrest in the presence of unattached kinetochores, proper chromosome alignment and segregation (Abrieu et al., 2001; Stucke et al., 2002; Jelluma et al., 2008a; Hewitt et al., 2010; Santaguida et al., 2010). Recent studies have shown that Mps1 phosphorylates Borealin to enhance Aurora-B kinase activity (Jelluma et al., 2008b; Saurin et al., 2011); however, other studies did not detect changes in Aurora-B activity upon Mps1 inhibition. Instead, Aurora-B activity was required for optimal localization of Mps1 to kinetochores (Hewitt et al., 2010; Maciejowski et al., 2010; Santaguida et al., 2010). However, a role for Mps1 in preventing merotelic attachments has not been previously described.

In the present study, using human cells depleted of Chk1 by small interfering RNA (siRNA) and DT40 avian B-lymphoma cells in which Chk1 was genetically ablated by gene targeting (Zachos et al., 2003), we show that Chk1 protects against anaphases with merotelic attachments and lagging chromosomes and is required for correction of merotelic attachments in metaphase-delayed cells. Reduced Chk1 activity leads to hyperstable kMTs and Chk1 is required for stable binding of MCAK, Kif2b and Mps1 to centromeres or kinetochores and for mitotic

phosphorylation of Hec1 on Ser55 and Ser44. Furthermore, Aurora-B phosphorylated at Ser331 localizes at kinetochores and this phosphorylation is high in prometaphase and decreases significantly in metaphase cells. Using cells overexpressing wild-type or non-phosphorylatable Ser331 to alanine (S331A) mutant Aurora-B (Petsalaki et al., 2011), we propose that Ser331 phosphorylation is required for optimal MCAK, Kif2b and Mps1 localization to centromeres or kinetochores and for Hec1 phosphorylation. Furthermore, inhibition of Mps1 activity or Mps1 depletion diminish initial recruitment of MCAK and Kif2b to centromeres or kinetochores, impair mitotic Hec1 phosphorylation and exacerbate merotelic attachments and lagging chromosomes in Chk1-deficient cells. On the basis of those findings, we propose that Chk1 and Mps1 jointly regulate Aurora-B, MCAK, Kif2b and Hec1 functions to promote correction of merotelic attachments.

## Results

### Chk1-deficient cells exhibit high levels of anaphases with merotelic attachments and lagging chromosomes

To investigate a role for Chk1 in preventing anaphases with merotelic attachments, human colon carcinoma BE cells transiently transfected with negative siRNA (control), Chk1 siRNA (siChk1) or treated with the selective Chk1 inhibitor UCN-01 were analyzed by confocal microscopy. Depletion of Chk1 or inhibition of Chk1 activity by UCN-01 increased the frequency of anaphases with merotelic attachments (13.3% and 13.4%, respectively) compared to controls (3.9%; Fig. 1A,B).

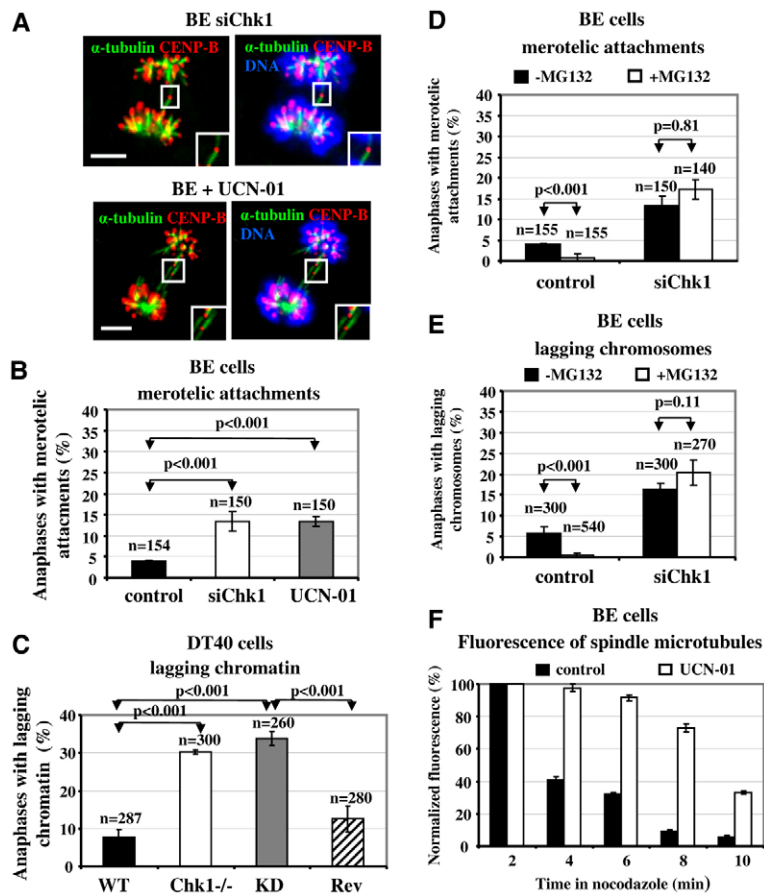

**Fig. 1. Chk1 is required for correction of merotelic attachments in metaphase-delayed cells.** (A,B) BE cells were transfected with negative siRNA (control) or Chk1 siRNA (siChk1) or were treated with UCN-01 for 3 hours. (A) Examples of anaphases. A single sister centromere is connected to microtubules from both spindle poles. Green,  $\alpha$ -tubulin; red, CENP-B; blue, DNA. Insets show magnified centromeres. Scale bars: 5  $\mu$ m. (B) Frequencies of anaphases with merotelic attachments. A minimum of 50 anaphases were analyzed for each of three independent experiments. (C) Frequencies of anaphases with lagging chromatin in wild-type (WT), *Chk1*<sup>-/-</sup>, kinase-dead (KD) or revertant (Rev) DT40 cells. A minimum of 80 anaphases were analyzed for each of three independent experiments. (D,E) Frequencies of anaphases with merotelic attachments (D) or lagging chromosomes (E) in BE cells transfected as in A and analyzed in anaphase in the absence of drug treatment (-MG132) or after recovery from a 3-hour MG132 treatment (+MG132). A minimum of 50 (D) or 90 (E) anaphases were analyzed for each of three independent experiments; *n*, total number of anaphases tested. (F) Inhibition of Chk1 reduces sensitivity of kMTs to nocodazole. BE cells were treated with MG132 for 3 hours in the absence (control) or presence of UCN-01 and exposed to high concentrations of nocodazole. Microtubule-associated fluorescence intensities were normalized to the 2-minute time point. A minimum of 10 mitotic cells were analyzed for each time point. Values are mean  $\pm$  s.d.

Furthermore, Chk1 depletion or treatment of cells with UCN-01 increased the frequency of anaphases with lagging chromosomes (15.1% and 14%, respectively) compared to controls (4.7%) and lagging chromosomes typically consisted of a single chromatid localized near the cell equator (supplementary material Fig. S1A,B).

To verify these observations in a different cell type, we used wild-type DT40 cells (WT), Chk1-deficient DT40 cells (*Chk1*<sup>-/-</sup>), *Chk1*<sup>-/-</sup> cells reconstituted with avian wild-type Chk1 protein (revertant cells, Rev), or *Chk1*<sup>-/-</sup> cells reconstituted with mutant aspartic acid 130 to alanine (D130A) avian Chk1 protein (kinase-dead cells, KD; supplementary material Fig. S1C). *Chk1*<sup>-/-</sup> or KD cells exhibited higher incidence of anaphases with lagging chromatin (30.3% and 33.8%, respectively) compared to WT (7.6%) or Rev (12.5%; Fig. 1C). Furthermore, 18/80 (22.5%) *Chk1*<sup>-/-</sup> cells in anaphase exhibited merotelic attachments compared to 1/80 (1.3%) WT and 3/80 (3.8%) Rev (supplementary material Fig. S1D). Taken together, these results show that Chk1 activity prevents anaphases with merotelic attachments and lagging chromosomes in vertebrate cells.

#### **Chk1 is required for correction of merotelic attachments in metaphase-arrested cells**

Lagging chromosomes can be caused by inefficient correction of merotelic attachments before anaphase. To investigate a role for Chk1 in error correction, control or Chk1-deficient cells were treated with the proteasome inhibitor MG132 for 3 hours to prolong metaphase (Cimini et al., 2003). At the end of this treatment, the drug was washed out and cells were released in fresh medium for the appropriate time to accomplish metaphase to anaphase transition, prior to fixation for analysis by confocal microscopy. In control BE cells, delayed anaphase onset by MG132 reduced the frequency of anaphases with merotelic attachments (0.6%) or lagging chromosomes (0.6%) compared to cells progressing into anaphase without MG132 delay (3.9% and 5.7%, respectively; Fig. 1D,E). In contrast, treatment of Chk1-depleted cells with MG132 did not reduce anaphases with merotelic attachments (17.2%) or lagging chromosomes (20.3%) compared to untreated (13.3% and 16.3%, respectively; Fig. 1D,E).

Furthermore, treatment of DT40 cells with MG132 reduced the frequency of anaphases with lagging chromatin in WT cells (1%) compared to untreated (6.7%), but not in *Chk1*<sup>-/-</sup> cells compared to untreated (32.8% and 28.8%, respectively; supplementary material Fig. S1E). Collectively, these results suggest that Chk1 is required for correction of merotelic attachments before anaphase.

#### **Inhibition of Chk1 leads to hyper-stable kinetochore microtubules**

Hyper-stable kMTs associate with increased kinetochore mis-attachments (Cimini et al., 2006; Bakhoum et al., 2009). Importantly, BE cells arrested in metaphase with MG132 and treated with UCN-01 exhibited delayed depolymerization of kMTs in the presence of high doses of nocodazole, indicating hyper-stable kMTs, compared to controls (Fig. 1F; supplementary material Fig. S2A). These results suggest that Chk1 kinase activity is required for optimal stability of kMTs.

#### **Chk1 is required for localization of MCAK and Kif2b to centromeres or kinetochores**

MCAK and Kif2b destabilize kMTs. Confocal microscopy analysis of BE cells in prometaphase transiently expressing MCAK:GFP showed that depletion of Chk1 reduced MCAK:GFP staining at centromeres/kinetochores by ~78% compared to controls ( $P < 0.001$ ; Fig. 2A). As a positive control, treatment of cells with the Aurora-B inhibitor VX680 (VX) reduced MCAK:GFP staining at centromeres/kinetochores by 91% compared to controls ( $P < 0.001$ ; Fig. 2A). Also, in metaphase cells, depletion of Chk1 reduced MCAK:GFP staining at kinetochores by 86% compared to controls ( $P < 0.001$ ; Fig. 2B).

Furthermore, BE cells in prometaphase transiently expressing Kif2b:GFP exhibited reduced localization of Kif2b:GFP to kinetochores after Chk1 depletion or VX680 treatment by, respectively, 81% and 94% compared to controls ( $P < 0.001$ ; Fig. 2C). Significantly, MCAK:GFP or Kif2b:GFP levels per se were not affected by Chk1 depletion (Fig. 2D). Taken together, these results show that Chk1 is required for optimal localization of MCAK and Kif2b to centromeres or kinetochores during unperturbed mitosis, i.e. in the absence of spindle poisons.

#### **Chk1 is required for Hec1 Ser55 and Ser44 phosphorylation**

Phosphorylation of Hec1 at Ser55 (pS55) and Ser44 (pS44) destabilises kinetochore-microtubule attachments. BE control cells in prometaphase exhibited phosphorylated Ser55 at kinetochores and this phosphorylation was reduced after Chk1 depletion or VX680 treatment by, respectively, 81% and 84% compared to controls ( $P < 0.001$ ; Fig. 3A; supplementary material Fig. S2B). Furthermore, control cells in metaphase exhibited reduced phosphorylation of Ser55 at kinetochores by 55% compared to prometaphase controls ( $P < 0.001$ ; Fig. 3B; supplementary material Fig. S2B). Significantly, depletion of Chk1 further reduced pS55 kinetochore staining in metaphase cells by 71% compared to controls ( $P < 0.001$ ; Fig. 3B; supplementary material Fig. S2B). In addition, Chk1-depleted or VX680-treated cells in prometaphase exhibited reduced Hec1 Ser44 phosphorylation by, respectively, 86% and 89% compared to controls ( $P < 0.001$ ; supplementary material Fig. S2C). Of note, Ser55 and Ser44 phospho-antibodies cross-reacted with the spindle poles and this staining was non-specific (DeLuca et al., 2011). Taken together, these results show that Chk1 is required for optimal phosphorylation of Hec1 Ser55 and Ser44 in mitosis.

#### **Phosphorylation of Aurora-B Ser331 at kinetochores is high in prometaphase and decreases in metaphase cells**

Chk1 phosphorylates Aurora-B on Ser331. Phosphorylated Ser331 colocalized with CENP-A and Hec1 at kinetochores in prometaphase and metaphase cells (Fig. 3C; supplementary material Fig. S3A). Significantly, quantification of pS331/CENP-A and pS331/Hec1 kinetochore fluorescence intensities revealed a, respectively, 53% and 57% decrease in phospho-Ser331 kinetochore staining from prometaphase to metaphase cells ( $P < 0.001$ ; Fig. 3C; supplementary material Fig. S3A). In comparison, depletion of Chk1 further diminished phospho-Ser331 kinetochore staining in metaphase cells by 94% compared to controls (Fig. 3C); however, it did not reduce total Aurora-B centromere staining ( $P = 0.76$ ; supplementary material Fig. S3B). Please note that the Ser331 phospho-antibody cross-reacted with the spindle poles and this staining was non-specific (Petsalaki et al., 2011).



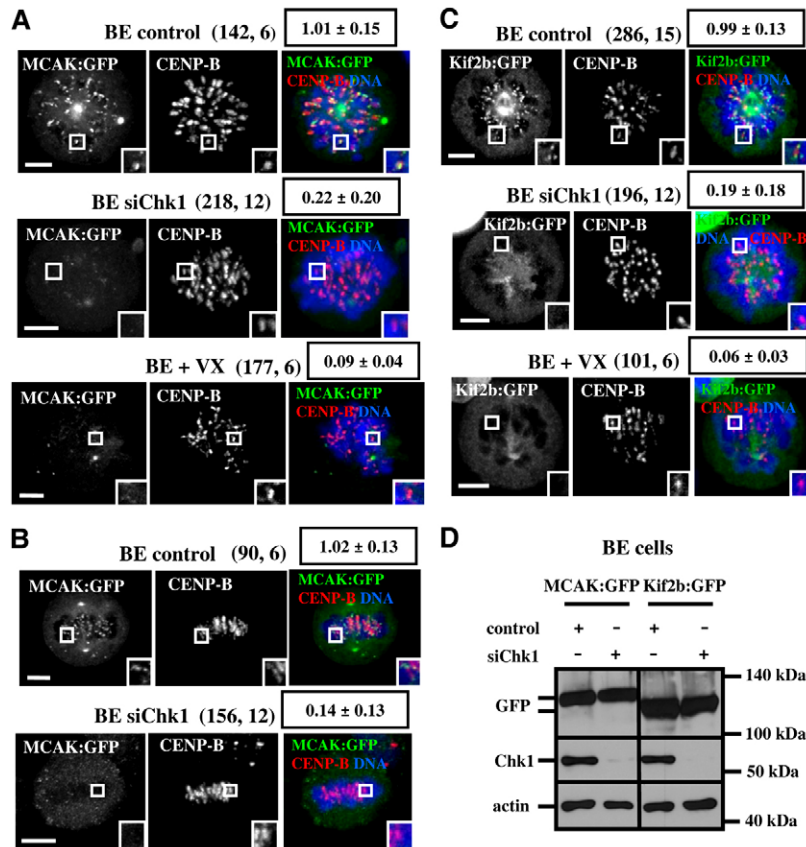

**Fig. 2. Chk1 is required for localization of MCAK:GFP and Kif2b:GFP to centromeres or kinetochores.**

(A,B) Localization of MCAK:GFP in prometaphase (A) and metaphase (B) cells. BE cells expressing MCAK:GFP were transfected with negative siRNA (control) or Chk1 siRNA (siChk1) or were treated with VX680 (VX) for 3 hours. Green, MCAK:GFP; red, CENP-B; blue, DNA. (C) Localization of Kif2b:GFP in prometaphase cells. BE cells expressing Kif2b:GFP were treated as in A. Green, Kif2b:GFP; red, CENP-B; blue, DNA. Boxed values show mean GFP/CENP-B fluorescence intensity. Values in brackets represent kinetochore pairs quantified, followed by the number of cells analyzed. Insets show magnified kinetochores. (D) Western blot analysis of total GFP, Chk1 and actin in BE cells expressing MCAK:GFP or Kif2b:GFP and transfected as in A. Scale bars: 5  $\mu$ m.

### Phosphorylation of Ser331 prevents merotelic attachments and lagging chromosomes in anaphase

To investigate a role for Ser331 phosphorylation in preventing merotelic attachments, CHO cells expressing 6xMyc-tagged wild-type or S331A Aurora-B under control of a Tetracycline-induced promoter were analyzed by confocal microscopy (Petsalaki et al., 2011). After induction with Tetracycline, 67/300 (22.3%) of CHO<sup>S331A</sup> cells exhibited anaphases with merotelic kinetochore attachments compared to 3/300 (1%) of CHO<sup>WT</sup> cells ( $P < 0.001$ ; Fig. 3D). Furthermore, 109/300 (36.3%) of CHO<sup>S331A</sup> cells exhibited anaphases with lagging chromosomes compared to 17/300 (5.7%) of CHO<sup>WT</sup> cells ( $P < 0.001$ ; supplementary material Fig. S3C). Please note that CENP-B localizes to kinetochores in CHO cells (Cooke et al., 1990). These results suggest that phosphorylation of Aurora-B Ser331 prevents anaphases with merotelic attachments and lagging chromosomes.

### Phosphorylation of Ser331 is required for localization of MCAK and Kif2b to centromeres or kinetochores

To investigate the significance of Ser331 phosphorylation for MCAK and Kif2b localization, CHO<sup>WT</sup> and CHO<sup>S331A</sup> cells transiently expressing MCAK:GFP or Kif2b:GFP were induced with Tetracycline and analysed by confocal microscopy. In prometaphase cells, expression of Aurora-B<sup>S331A</sup> reduced localization of MCAK:GFP to centromeres or kinetochores by 72% compared to CHO<sup>WT</sup> ( $P < 0.001$ ; Fig. 4A). In comparison, treatment of CHO<sup>WT</sup> cells with VX680 or UCN-01 reduced MCAK:GFP staining at centromeres/kinetochores by, respectively, 82% and 80% compared to controls ( $P < 0.001$ ;

Fig. 4A; supplementary material Fig. S3D). Also, CHO<sup>S331A</sup> cells in metaphase exhibited diminished localization of MCAK:GFP to kinetochores by 80% compared to CHO<sup>WT</sup> ( $P < 0.001$ ; Fig. 4B).

Furthermore, expression of Aurora-B<sup>S331A</sup> or treatment of cells with VX680 reduced localization of Kif2b:GFP to kinetochores in prometaphase by, respectively, 84% and 92% compared to controls ( $P < 0.001$ ; Fig. 4C). Taken together, these results suggest that Aurora-B Ser331 phosphorylation is required for optimal localization of MCAK and Kif2b to centromeres or kinetochores.

### Phosphorylation of Ser331 is required for Hec1 phosphorylation

Furthermore, after induction with Tetracycline, CHO<sup>S331A</sup> cells in prometaphase exhibited reduced Hec1 Ser55 phosphorylation at kinetochores by 73% compared to CHO<sup>WT</sup> ( $P < 0.001$ ; Fig. 4D). In comparison, treatment of CHO<sup>WT</sup> cells with VX680 or UCN-01 diminished phospho-Ser55 kinetochore staining by, respectively, 83% and 82% compared to controls ( $P < 0.001$ ; Fig. 4D; supplementary material Fig. S4A,C).

In addition, CHO<sup>WT</sup> cells in metaphase exhibited reduced phosphorylation of Ser55 at kinetochores by 56% compared to prometaphase CHO<sup>WT</sup> ( $P < 0.001$ ; supplementary material Fig. S4B,C). Significantly, expression of Aurora-B<sup>S331A</sup> further reduced phospho-Ser55 kinetochore staining in metaphase by 67% compared to CHO<sup>WT</sup> ( $P < 0.001$ ; supplementary material Fig. S4B,C). Taken together, these results suggest that phosphorylation of Ser331 is required for optimal phosphorylation of Hec1 Ser55.

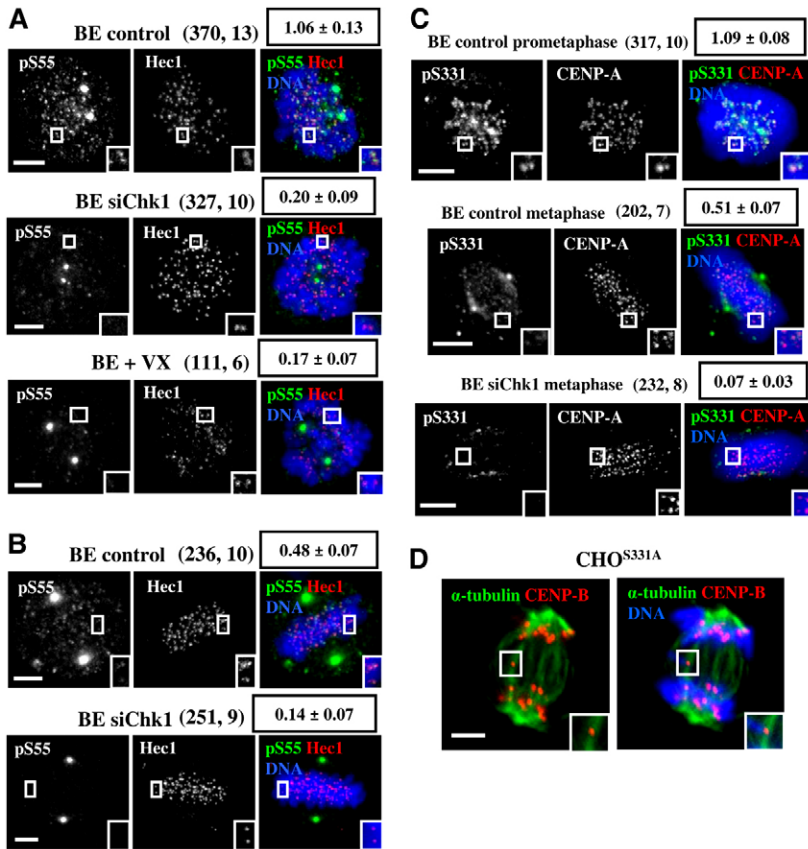

**Fig. 3. Chk1 is required for optimal Hec1 Ser55**

**phosphorylation.** (A,B) Phosphorylation of Hec1 Ser55 in prometaphase (A) or metaphase cells (B). BE cells were transfected with negative siRNA (control) or Chk1 siRNA (siChk1) or were treated with VX680 (VX) for 3 hours. Boxed values show mean pS55/Hec1 fluorescence intensity. Green, pS55; red, Hec1; blue, DNA. (C) Ser331 phosphorylation in BE cells transfected as in A. Boxed values show mean pS331/CENP-A fluorescence intensity. Green, pS331; red, CENP-A; blue, DNA. Values in brackets represent kinetochore pairs quantified, followed by the number of cells analyzed. (D) Example of an anaphase with merotelic kinetochore attachments in a CHO<sup>S331A</sup> cell induced with Tetracycline. A single kinetochore is connected to microtubules from both spindle poles. Green,  $\alpha$ -tubulin; red, CENP-B; blue, DNA. Insets show magnified kinetochores. Scale bars: 5  $\mu$ m.

#### Additive effects from inhibition of Mps1 and Chk1 depletion

Mps1 is required for chromosome segregation. Inhibition of Mps1 activity by AZ3146 (AZ) in BE cells transfected with negative siRNA (control + AZ) increased the frequency of anaphases with merotelic attachments (64.6%) and lagging chromosomes (70%) compared to controls (2.6% and 5.2%, respectively; Fig. 5A; supplementary material Fig. S4D–F). Importantly, combined Chk1 depletion with AZ3146 treatment (siChk1 + AZ) further increased anaphases with merotelic attachments (76.4%) and lagging chromosomes (83.8%) compared to control + AZ cells (Fig. 5A; supplementary material Fig. S4F). These results show that inhibition of Mps1 and Chk1 depletion exhibit an additive effect on anaphases with merotelic attachments and lagging chromosomes.

#### Inhibition of Mps1 impairs localization of MCAK and Kif2b to centromeres or kinetochores

Treatment with AZ3146 or depletion of Mps1 by siRNA (siMps1; supplementary material Fig. S4G) reduced localization of MCAK:GFP to centromeres/kinetochores in prometaphase cells by 54% or 57%, respectively compared to controls ( $P < 0.001$ ; Fig. 5B; supplementary material Fig. S5A). Significantly, combined Chk1 depletion with AZ3146 or siMps1 treatment further diminished MCAK:GFP staining at centromeres/kinetochores by 88–89% compared to AZ3146 or siMps1 alone ( $P < 0.001$ ; Fig. 5B; supplementary material Fig. S5A). Furthermore, cells treated with AZ3146 exhibited metaphases with misaligned chromosomes and MCAK:GFP staining at kinetochores was reduced by 61% compared to controls ( $P < 0.001$ ; Fig. 5C). These results show that Chk1 and

Mps1 jointly regulate localization of MCAK to centromeres or kinetochores during unperturbed mitosis.

Furthermore, treatment of cells with AZ3146, siMps1 or combined Chk1 depletion with AZ3146 or siMps1 treatment reduced localization of Kif2b:GFP to kinetochores by 95–96% compared to controls ( $P < 0.001$ ; Fig. 5D; supplementary material Fig. S5B). Importantly, MCAK:GFP or Kif2b:GFP levels per se were not affected by AZ3146 treatment in the absence or presence of Chk1 siRNA (Fig. 6A). Taken together, these results show that Mps1 activity is required for optimal localization of MCAK and Kif2b to centromeres or kinetochores.

#### Mps1 activity is required for initial binding and Chk1 for maintenance of MCAK to centromeres

To investigate whether Chk1 and Mps1 are required for prolonged binding or initial recruitment of MCAK and Kif2b to centromeres or kinetochores, cells were incubated with taxol, a spindle drug that stabilizes kinetochore–microtubule attachments and reduces tension at kinetochores (Schiff and Horwitz, 1980; Yang et al., 2009). MG132 was also added to the culture medium to prevent mitotic exit of cells after Chk1 depletion or AZ3146 treatment (Schmidt et al., 2005; Zachos et al., 2007).

After treatment with taxol and MG132 for 6 hours, localization of MCAK:GFP to centromeres in control + AZ cells was reduced by 52% compared to controls ( $P < 0.001$ ; Fig. 6B,D). Furthermore, depletion of Chk1, combined Chk1 depletion with AZ3146 treatment, or combined transfection of negative siRNA with VX680 treatment (control + VX) reduced MCAK:GFP staining at centromeres by 90–96% compared to control cells ( $P < 0.001$ ; Fig. 6B,D).

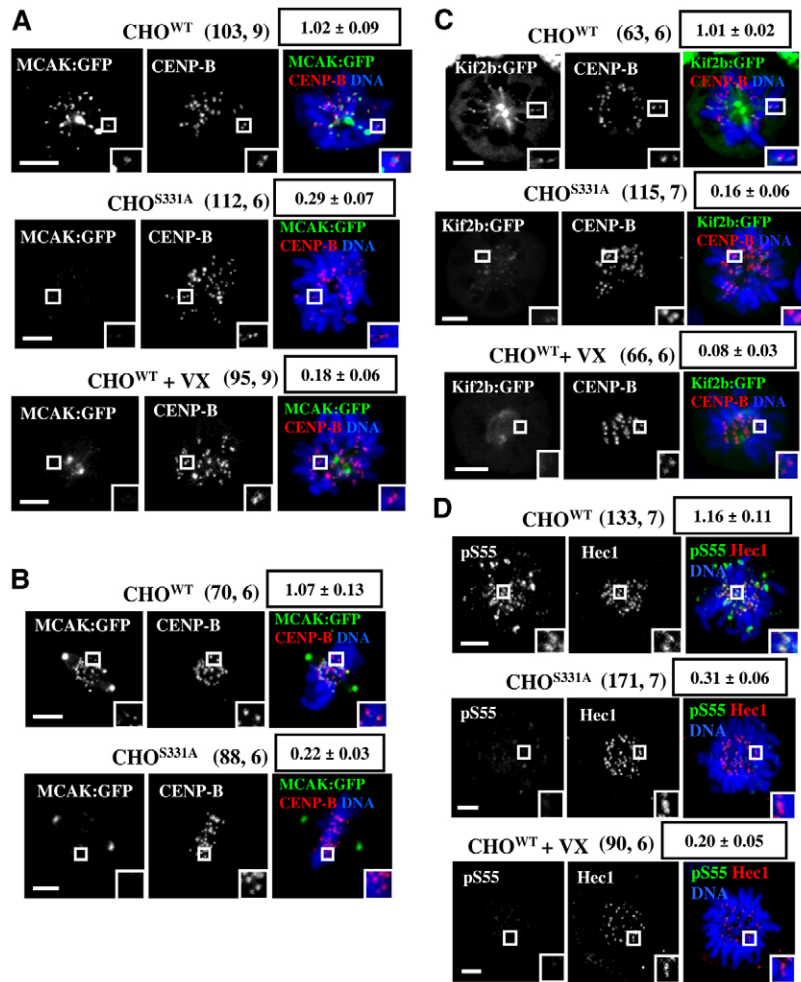

**Fig. 4. Expression of S331A Aurora-B diminishes localization of MCAK:GFP and Kif2b:GFP to centromeres or kinetochores and reduces Hec1 Ser55 phosphorylation.** (A,B) Localization of MCAK:GFP in prometaphase (A) or metaphase cells (B). Tetracycline-induced CHO<sup>WT</sup> or CHO<sup>S331A</sup> cells expressing MCAK:GFP were untreated or treated with VX680 (VX) for 3 hours. (C) Localization of Kif2b:GFP. Tetracycline-induced CHO<sup>WT</sup> or CHO<sup>S331A</sup> cells expressing Kif2b:GFP were as in A. Boxed values show mean GFP/CENP-B fluorescence intensity. Green, GFP; red, CENP-B; blue, DNA. (D) Hec1 Ser55 phosphorylation. Tetracycline-induced CHO<sup>WT</sup> or CHO<sup>S331A</sup> cells were as in A. Boxed values show mean pS55/Hec1 fluorescence intensity. Green, pS55; red, Hec1; blue, DNA. Values in brackets represent kinetochore pairs quantified, followed by the number of cells analyzed. Insets show magnified kinetochores. Scale bars: 5  $\mu$ m.

Surprisingly, after treatment with taxol and MG132 for 1 hour, Chk1-depleted and control cells exhibited similar levels of MCAK:GFP at centromeres ( $P=0.48$ ; Fig. 6C,D). These results show that Chk1-depleted cells treated with taxol are capable of MCAK:GFP binding and that it is MCAK maintenance at centromeres, rather than its initial recruitment, that is affected in Chk1-depleted cells. In contrast, control + AZ, control + VX or siChk1 + VX cells treated with taxol and MG132 for 1 hour exhibited diminished MCAK:GFP staining at centromeres by 53–57% compared to controls ( $P<0.001$ ; Fig. 6C,D). These results suggest that Mps1 activity is required for optimal initial binding of MCAK to centromeres in the presence of taxol.

#### Mps1 activity is required for initial recruitment and Chk1 for maintenance of Kif2b to kinetochores

Furthermore, after treatment with taxol and MG132 for 6 hours, localization of Kif2b:GFP to kinetochores in Chk1-depleted, control + AZ, control + VX, or siChk1 + AZ cells was reduced by 89–93% compared to controls ( $P<0.001$ ; Fig. 7A,C). Significantly, after treatment with taxol and MG132 for 1 hour, Chk1-depleted and control cells exhibited similar levels of Kif2b:GFP at kinetochores ( $P=0.71$ ; Fig. 7B,C). However, treatment of cells with AZ3146, VX680 or combined Chk1 depletion with AZ3146 treatment diminished Kif2b:GFP kinetochore staining by 89–93% compared to controls

( $P<0.001$ ; Fig. 7B,C). These results show that Chk1 is required for maintenance, but not initial binding of Kif2b to kinetochores in the presence of taxol. These results also show that Mps1 activity is required for initial recruitment of Kif2b to kinetochores.

#### Mps1 is required for Hec1 Ser55 phosphorylation

Furthermore, treatment of BE cells with AZ3146 or combined Chk1 depletion with AZ3146 treatment reduced Hec1 Ser55 phosphorylation at kinetochores by 74% in prometaphase and by 65–69% in metaphase compared to controls ( $P<0.001$ ; Fig. 8A; supplementary material Fig. S5C). In addition, in the presence of taxol and MG132 for 1 hour, phospho-Ser55 kinetochore staining in Chk1-depleted, control + AZ, or siChk1 + AZ cells was reduced by 78–81% compared to controls ( $P<0.001$ ; supplementary material Fig. S5D). Collectively, these results show that Mps1 activity is required for optimal phosphorylation of Hec1 at Ser55 during unperturbed mitosis or treatment with taxol.

#### Chk1 is required for stable binding of Mps1 to kinetochores

Inhibition of Mps1 significantly increases its own abundance at kinetochores (Hewitt et al., 2010). To investigate a role for Chk1 in Mps1 localization, BE cells were treated with AZ3146 and analyzed in prometaphase by confocal microscopy. Depletion of



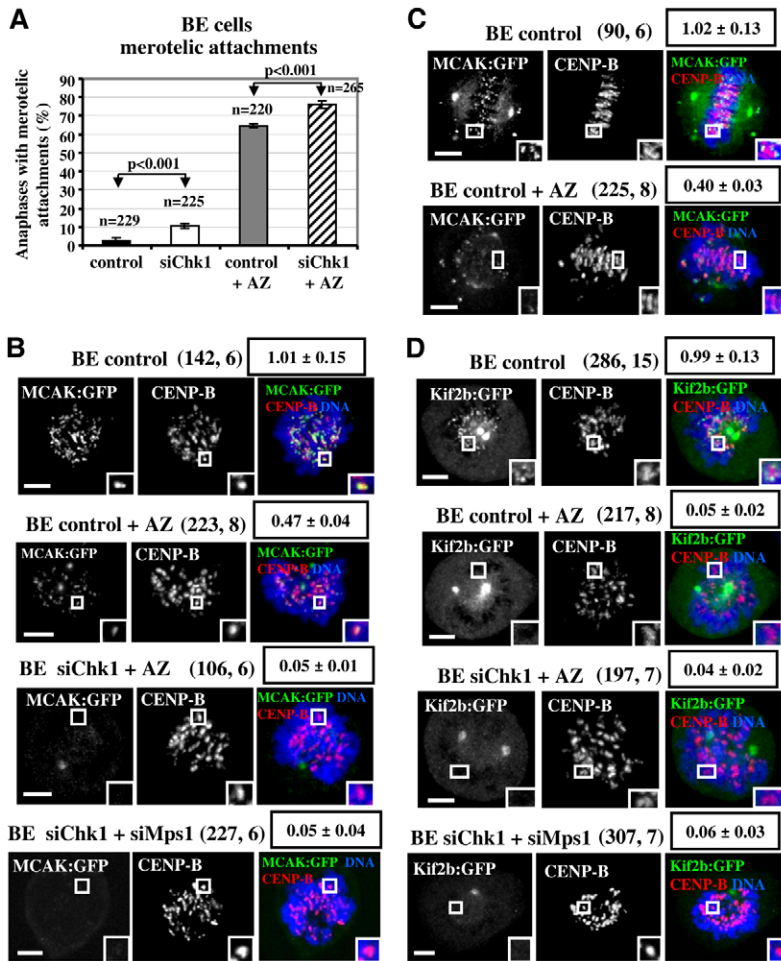

**Fig. 5. Additive effects from inhibition of Mps1 and Chk1.** (A) Frequencies of anaphases with merotelic attachments. BE cells transfected with negative siRNA (control) or Chk1 siRNA (siChk1) were untreated or treated with AZ3146 (AZ) for 3 hours and analyzed in anaphase. Values are mean  $\pm$  s.d. from three independent experiments. A minimum of 60 anaphases were analyzed for each experiment. *n*, total number of anaphases tested. (B–D) Localization of MCAK:GFP (B,C) or Kif2b:GFP (D). BE cells expressing MCAK:GFP or Kif2b:GFP were treated as in A in the absence or presence of Mps1 siRNA (siMps1). Boxed values show mean GFP/CENP-B fluorescence intensity. Green, GFP; red, CENP-B; blue, DNA. Values in brackets represent kinetochore pairs quantified, followed by the number of cells analyzed. Insets show magnified kinetochores. Scale bars: 5  $\mu$ m.

Chk1 reduced Mps1 staining at kinetochores by 84% compared to controls ( $P < 0.001$ ; Fig. 8B). In comparison, treatment with VX680 diminished Mps1 staining at kinetochores by 90% compared to controls ( $P < 0.001$ ; Fig. 8B). These results show that Chk1 is required for optimal localization of Mps1 to kinetochores in the absence of spindle poisons.

Furthermore, after treatment with taxol, MG132 and AZ3146 for 1 hour, Chk1-depleted cells exhibited reduced Mps1 staining at kinetochores by 58% compared to controls ( $P < 0.001$ ; Fig. 8C) thus showing that kinetochores in Chk1-depleted cells are capable of weakened Mps1 binding. Significantly, treatment with taxol, MG132 and AZ3146 for 6 hours, diminished Mps1 kinetochore staining in Chk1-depleted cells by 94% compared to controls ( $P < 0.001$ ; supplementary material Fig. S5E). These results indicate that Chk1 is required for stable binding of Mps1 to kinetochores in the presence of taxol.

#### Phosphorylation of Ser331 is required for Mps1 localization to kinetochores

Furthermore, after induction with Tetracycline and treatment with AZ3146, CHO<sup>S331A</sup> cells transiently expressing Mps1:GFP exhibited reduced Mps1:GFP staining at kinetochores by 79% compared to CHO<sup>WT</sup> ( $P < 0.001$ ; Fig. 8D). These results suggest that Aurora-B Ser331 phosphorylation is required for optimal localization of Mps1 to kinetochores. In contrast, treatment of BE cells with AZ3146 did not significantly alter Ser331

phosphorylation at kinetochores compared to controls ( $P = 0.44$ ; supplementary material Fig. S6). In comparison, UCN-01 treatment reduced phospho-Ser331 kinetochore staining by 89% compared to controls ( $P < 0.001$ ; supplementary material Fig. S6).

#### Discussion

Recent studies in yeast (Pinsky et al., 2009; Vanoosthuyse and Hardwick, 2009) and vertebrate cells (Maldonado and Kapoor, 2011; Santaguida et al., 2011; Saurin et al., 2011) have shown that potent inhibition of Aurora-B weakens the mitotic arrest in the presence of many unattached kinetochores and suggest that Aurora-B contributes to spindle checkpoint signalling independently of error correction. This is an actively debated issue (Yang et al., 2009), it is therefore important to understand Aurora-B regulation and downstream signalling during error correction. We previously showed that Chk1 phosphorylates Aurora-B at Ser331 and this phosphorylation is required for optimal spindle checkpoint function (Zachos et al., 2007; Petsalaki et al., 2011). In the present study, we show that Chk1 protects against anaphases with merotelic attachments and lagging chromosomes and is required for correction of merotelic attachments in metaphase-delayed cells. Spindle checkpoint defects can result in anaphases with mono-attached or syntelically attached chromosomes and both sister chromatids delivered to one daughter cell (Kops et al., 2005). It is therefore

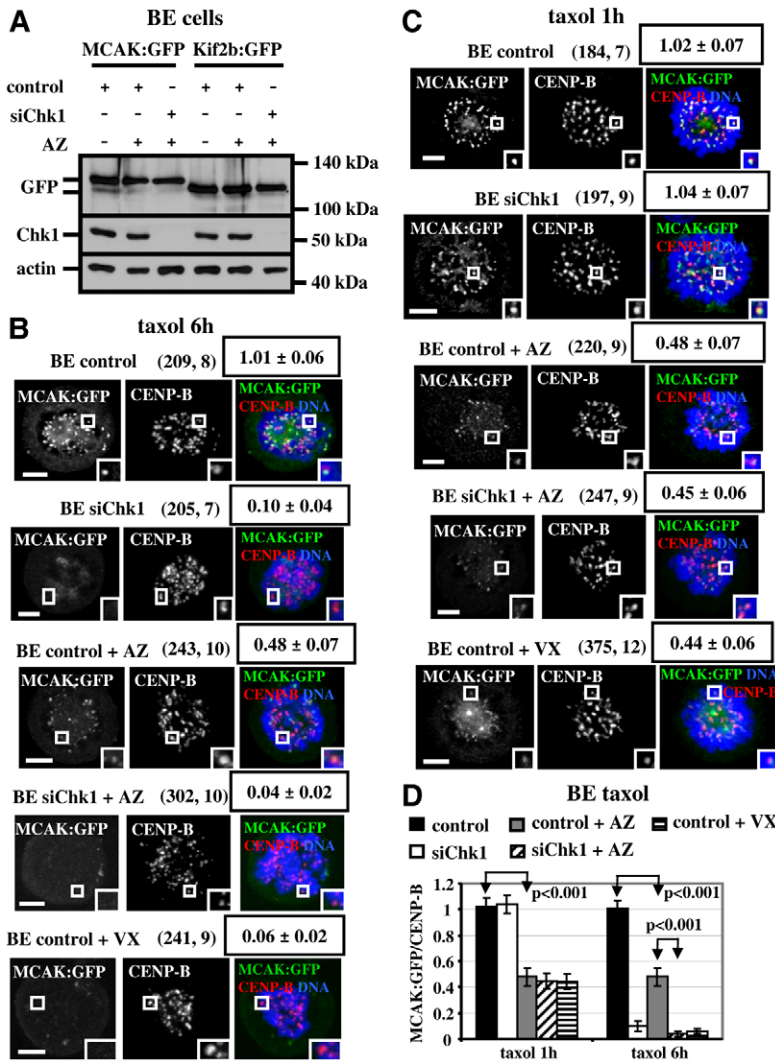

**Fig. 6. Mps1 activity is required for initial binding and Chk1 for maintenance of MCAK:GFP to centromeres.** (A) Western blot analysis of total GFP, Chk1 and actin. BE cells expressing MCAK:GFP or Kif2b:GFP were transfected with negative siRNA (control) or Chk1 siRNA (siChk1) and treated with AZ3146 for 3 hours. (B,C) Localization of MCAK:GFP. BE cells expressing MCAK:GFP were transfected as in A and treated with taxol and MG132 in the absence or presence of AZ3146 (AZ) or VX680 (VX) for 6 hours (B) or for 1 hour (C). Boxed values show mean GFP/CENP-B fluorescence intensity. Green, GFP; red, CENP-B; blue, DNA. Values in brackets represent kinetochore pairs quantified, followed by the number of cells analyzed. Insets show magnified centromeres. Scale bars: 5  $\mu$ m. (D) GFP/CENP-B fluorescence intensity at centromeres in cells from B and C. Values are mean  $\pm$  s.d.

unlikely that spindle checkpoint failure accounts for anaphases with merotelic attachments in Chk1-deficient cells. Instead, our data suggest a novel role for Chk1 in correction of mis-attached kinetochores. Furthermore, we show that Chk1 activity is required for optimal stability of KMTs, for localization of MCAK and Kif2b to centromeres or kinetochores and for Hec1 Ser55 and Ser44 phosphorylation.

Aurora-B phosphorylated at Ser331 colocalizes with CENP-A and Hec1 at kinetochores, in agreement with recent studies showing a small population of Aurora-B at kinetochores (Posch et al., 2010; DeLuca et al., 2011; Petsalaki et al., 2011). Significantly, Aurora-B Ser331 phosphorylation is high in prometaphase and decreases in metaphase cells, thus suggesting a role for Ser331 phosphorylation in chromosome bi-orientation (DeLuca et al., 2011). Furthermore, using cells overexpressing wild-type or non-phosphorylatable mutant S331A Aurora-B we propose that Ser331 phosphorylation and complete Aurora-B activation is required for optimal localization of MCAK and Kif2b to centromeres or kinetochores and mitotic Hec1 phosphorylation during correction of merotelic attachments (Petsalaki et al., 2011).

We also show that inhibition of Mps1 induces merotelic attachments and anaphase lagging chromosomes and exhibits an

additive effect with Chk1 depletion. To our knowledge, this is the first report describing a role for Mps1 in preventing merotelic attachments. Furthermore, inhibition of Mps1 diminishes localization of MCAK and Kif2b to centromeres or kinetochores and reduces Hec1 Ser55 phosphorylation during unperturbed mitosis. Aurora-B phosphorylates Hec1 Ser55 and MCAK and Kif2b localization depend on Aurora-B kinase activity (Andrews et al., 2004; DeLuca et al., 2006; Bakhoum et al., 2009). One possibility is that Mps1 phosphorylates Borealin to enhance Aurora-B activity towards specific substrates (such as Hec1) or after certain treatments (Jelluma et al., 2008b; Slidrecht et al., 2010) but not others (Hewitt et al., 2010; Maciejowski et al., 2010; Santaguida et al., 2010); however, further experiments are required to fully support this idea.

Furthermore, using taxol, a drug that stabilizes kinetochore-microtubule attachments, we demonstrate that Mps1 activity is required for initial recruitment and Chk1 for sustained, but not initial, binding of MCAK and Kif2b to centromeres or kinetochores in prometaphase cells (Schiff and Horwitz, 1980; Yang et al., 2009). This is consistent with our findings that a population of Chk1-depleted cells is capable of weakened binding of MCAK and Kif2b to centromeres or kinetochores during unperturbed mitosis. In addition, we propose that Chk1



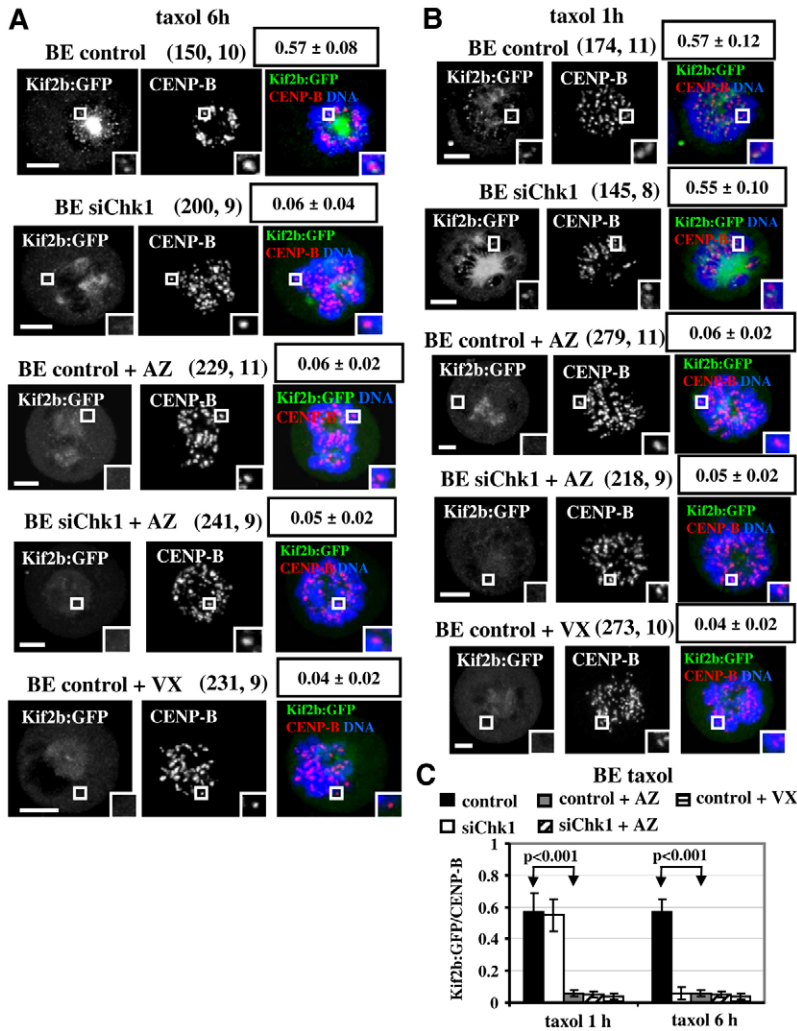

**Fig. 7. Mps1 activity is required for initial binding and Chk1 for maintenance of Kif2b:GFP to kinetochores.** (A,B) Localization of Kif2b:GFP. BE cells expressing Kif2b:GFP were transfected with negative siRNA (control) or Chk1 siRNA (siChk1) and treated with taxol and MG132 in the absence or presence of AZ3146 (AZ) or VX680 (VX) for 6 hours (A) or 1 hour (B). Boxed values show mean GFP/CENP-B fluorescence intensity. Green, GFP; red, CENP-B; blue, DNA. Values in brackets represent kinetochore pairs quantified, followed by the number of cells analyzed. Insets show magnified kinetochores. Scale bars: 5  $\mu$ m. (C) GFP/CENP-B fluorescence intensity at kinetochores in cells from A and B. Values are mean  $\pm$  s.d.

activity and Aurora-B Ser331 phosphorylation are required for stable binding of Mps1 to kinetochores, in agreement with recent findings that Aurora-B regulates localization of Mps1 (Hewitt et al., 2010; Santaguida et al., 2010). Our results are consistent with a feedback mechanism between Mps1 and Aurora-B rather than a strictly linear pathway in which one kinase is upstream of the other (Jelluma et al., 2008b; Hewitt et al., 2010; Santaguida et al., 2010). Significantly, inhibition of Mps1 did not reduce phosphorylated Ser331 at kinetochores (Jelluma et al., 2008b; Santaguida et al., 2010; van der Waal et al., 2012b).

On the basis of those findings, we propose the following model for the role of Chk1 and Mps1 in correction of merotelic attachments (Fig. 8E). Chk1 phosphorylates Aurora-B Ser331 and this phosphorylation is required for sustained binding of MCAK and Kif2b to centromeres or kinetochores, optimal phosphorylation of Hec1 at Ser44 and Ser55 and correction of merotelic attachments before anaphase. Furthermore, Chk1 promotes stable binding of Mps1 to kinetochores by phosphorylating Aurora-B Ser331. In turn, Mps1 is required for initial recruitment of MCAK and Kif2b to centromeres or kinetochores and mitotic Hec1 phosphorylation, perhaps through phosphorylating Borealin. Our model raises several important questions regarding regulation of MCAK and Kif2b by Mps1 and Chk1, the significance of Ser331 phosphorylation for specific

correction of kinetochore mis-attachments and the potential role of Chk1 and Mps1 in tumour cell killing by anti-mitotic agents.

Mps1 and Chk1 regulate initial binding and maintenance, respectively, of MCAK and Kif2b to centromeres or kinetochores. One possibility is that Chk1 and Mps1 regulate MCAK/Kif2b localization through modulating Aurora-B catalytic activity (Jelluma et al., 2008b; Petsalaki et al., 2011) and that different levels of Aurora-B activity are required for recruitment versus maintenance of MCAK and Kif2b. However, inhibition of Mps1, Chk1 or simultaneous inhibition of both kinases resulted in similar levels of Aurora-B activity as judged by Hec1 Ser55 or CENP-A Ser7 phosphorylation in the presence of taxol (Petsalaki et al., 2011). Alternatively, phosphorylation of Borealin by Mps1 and increased binding of Survivin to the CPC by Ser331 phosphorylation may influence substrate affinity of Aurora-B (Vader et al., 2006; Petsalaki et al., 2011). Furthermore, an Aurora-B-independent role for Mps1 in MCAK/Kif2b localization and error correction cannot be formally excluded. Mps1 phosphorylation targets include yeast Mad1 (Hardwick et al., 1996), yeast Ndc80/Hec1 (Kemmler et al., 2009) and vertebrate CENP-E mitotic proteins (Kim et al., 2010); however, a role for these phosphorylations in error correction has not been established.

Furthermore, Chk1-deficient cells treated with taxol for 1 hour exhibit MCAK and Kif2b staining at centromeres and

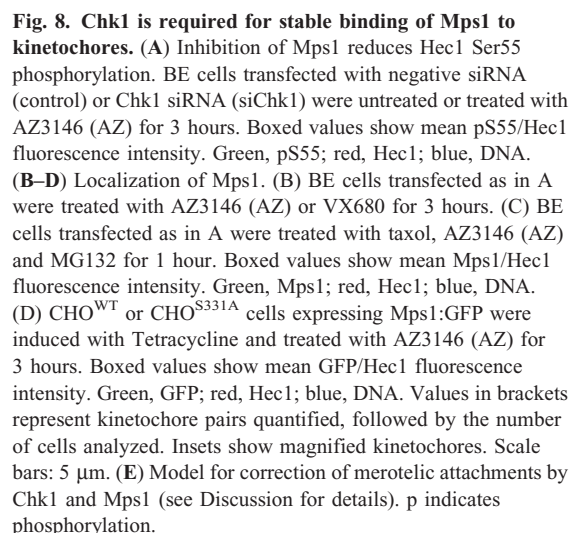

Several kinases including Chk1, Mps1 and Aurora-B are required for error correction and optimal spindle checkpoint

Plasmid MCAK:GFP coding for human MCAK fused to GFP was a gift from J. Swedlow (Andrews et al., 2004) and Kif2b:GFP plasmid coding for human Kif2b fused to GFP was from B. Orr and D. Compton (Bakhoum et al., 2009). Plasmid Mps1:GFP coding for human Mps1 fused to GFP was a gift from S. Taylor (Hewitt et al., 2010).

### Cell culture and treatments

Chk1-deficient avian B-lymphoma DT40 cells (*Chk1*<sup>-/-</sup>), *Chk1*<sup>-/-</sup> cells expressing exogenous avian wild-type Chk1 encoded by a transfected transgene (revertant cells) or *Chk1*<sup>-/-</sup> cells reconstituted with D130A avian Chk1 (kinase-dead cells) were as described (Zachos et al., 2003). The D130A mutant Chk1 protein shows an altered electrophoretic mobility but sequencing of the expression construct has confirmed that the D130A is the only mutation (Bourke et al., 2007). Chinese hamster ovary CHO<sup>WT</sup> and CHO<sup>S331A</sup> cells expressing 6×Myc-tagged human wild-type or S331A mutant Aurora-B respectively under control of Tetracycline-induced transgenes were previously described (Petsalaki et al., 2011).

Human colon carcinoma BE cells were grown in DMEM (GIBCO) containing 10% foetal bovine serum and CHO cells in Ham's F12 (GIBCO) supplemented with 10% foetal bovine serum, at 37°C, 5% CO<sub>2</sub>. DT40 cells were cultured in DMEM containing 10% foetal bovine serum, 1% chicken serum, 10<sup>-5</sup> M β-mercaptoethanol, at 39.5°C, 5% CO<sub>2</sub>.

Cells were treated with 25 nM taxol (AppliChem), 10 μg/ml MG132 (Merck), 300 nM VX680 (Selleckchem), 300 nM UCN-01 (Sigma), or 2 μM AZ3146 (Axon) as appropriate. To induce expression of Aurora-B transgenes, CHO<sup>WT</sup> or CHO<sup>S331A</sup> cells were treated with 17 ng/ml or 30 ng/ml Tetracycline (Sigma) respectively for 16 hours prior to analysis or further treatment with drugs (Petsalaki et al., 2011). Addition of Tetracycline stimulated accumulation of 6×Myc-Aurora-B<sup>WT</sup> or 6×Myc-Aurora-B<sup>S331A</sup> at approximate levels 10-fold-higher than the endogenous protein and this level of expression was shown to disrupt endogenous Aurora-B functions while maintaining correct localization of 6×Myc-Aurora-B to centromeres (Petsalaki et al., 2011).

Negative siRNA or siRNA duplexes designed to repress human TTK (Mps1) or Chk1 (Dharmacon) were transfected into BE cells 24–48 hours prior to analysis using Lipofectamine 2000 (Invitrogen). The siRNA sequences are available on request.

For expression of GFP proteins, plasmids were transfected into cells in the absence or presence of appropriate siRNA duplexes 48 hours prior to analysis or further treatment with drugs using Lipofectamine 2000 (Invitrogen).

### Recovery from MG132

Cells were treated with 10 μg/ml MG132 (Merck) for 3 hours. At the end of the treatment, cells were washed three times for 5 minutes with 37°C medium, cultured in fresh medium for 30–60 minutes and fixed as described below. Preliminary experiments had shown that many of the cells had accomplished metaphase to anaphase transition in 30–60 minutes and were observed in anaphase.

### Nocodazole sensitivity assay

Cells were treated with 10 μg/ml MG132 for 3 hours in the absence or presence of 300 nM UCN-01. At the end of the treatment, 500 ng/ml nocodazole was added to cells for various times, cells were fixed in paraformaldehyde in cytoskeleton buffer and analysed by confocal microscopy as described below. Images were collected at 0.2 μm stacks over 10-μm depth, merged using Leica LCS Lite software and microtubule-associated fluorescence for each mitotic cell was quantified by analyzing an equal image area using Image J (NIH). To investigate stability of kMTs, microtubule-associated fluorescence values were normalized to the 2 minute time point because, after 2 minutes in nocodazole, the majority of non-kinetochore-microtubules is depolymerized as determined by confocal microscopy (supplementary material Fig. S2A).

### Indirect immunofluorescence microscopy

For phospho-Hec1 (pS55 or pS44) staining, cells were pre-fixed in pre-warmed (37°C) 4% paraformaldehyde in Hec1-PHEM buffer (60 mM PIPES, 25 mM HEPES, 10 mM EGTA, 2 mM MgCl<sub>2</sub> pH 6.9) for 10 seconds at room temperature, permeabilised in pre-warmed (37°C) Hec1-PHEM supplemented with 1% Triton X-100 and 100 nM microcystin (Sigma) for 5 minutes at room temperature, fixed in pre-warmed (37°C) 4% paraformaldehyde in Hec1-PHEM for 20 minutes at room temperature, washed twice with phosphate-buffered saline (PBS) supplemented with 0.1% Triton X-100 and immunostained (DeLuca et al., 2011).

For pS331 staining, cells were rinsed twice in PHEM buffer (60 mM PIPES, 25 mM HEPES pH 7.0, 10 mM EGTA, 4 mM MgSO<sub>4</sub>), extracted in PHEM supplemented with 0.5% CHAPS and 100 nM Microcystin (Sigma) for 5 minutes at room temperature, fixed with cold methanol for 5 minutes at -20°C, washed twice with PBS and immunostained (Petsalaki et al., 2011).

To depolymerise the majority of non-kinetochore-microtubules and visualize merotelic attachments, cells were incubated in ice-cold medium for 15 minutes at 4°C, pre-fixed in pre-warmed (37°C) 4% paraformaldehyde in PHEM buffer (60 mM PIPES, 25 mM HEPES pH 7.0, 10 mM EGTA, 4 mM MgSO<sub>4</sub>) for 10 seconds at room temperature, permeabilized in pre-warmed (37°C) PHEM supplemented with 0.5% Triton X-100 for 5 minutes at room temperature, fixed in pre-warmed (37°C) 4% paraformaldehyde in PHEM for 20 minutes at room temperature, washed twice with PBS and immunostained (Silkworth et al., 2009).

For all other fluorescence microscopy applications including nocodazole sensitivity assays, cells were fixed in 4% paraformaldehyde in cytoskeleton buffer (1.1 M Na<sub>2</sub>HPO<sub>4</sub>, 0.4 M KH<sub>2</sub>PO<sub>4</sub>, 137 mM NaCl, 5 mM KCl, 2 mM MgCl<sub>2</sub>, 2 mM EGTA, 5 mM PIPES, 5 mM Glucose, pH 6.1) for 5 minutes at 37°C, permeabilised in 0.5% Triton X-100 in cytoskeleton buffer at room temperature and immunostained as appropriate (Zachos et al., 2007).

Fluorescein- (FITC) or Rhodamine-TRITC-conjugated secondary antibodies (Jackson ImmunoResearch) were used as appropriate. DNA was stained with 10 μM [TO-PRO-3 Iodide (642/661)] (Invitrogen) and cells were mounted in Vectashield medium (Vector laboratories). Images were collected using a Leica TCS SP2 laser scanning spectral confocal microscope, Leica LCS Lite software and a 63×Apochromat 1.40 NA oil objective. The Leica 11513859 low fluorescence immersion oil used was used and imaging was performed at room temperature. Average projections of image stacks were obtained using the Leica LCS Lite software.

To analyze fluorescence intensities, background readings were subtracted and fluorescence intensities quantified using Leica LCS Lite. The GFP values were normalized against the CENP-B or the Hec1 signal, the pS55 and pS44 against the Hec1 signal, the pS331 against the CENP-A signal and the Mps1 against the Hec1 signal. Several kinetochore pairs per cell from a minimum of three cells per experiment from two independent experiments were analyzed for each treatment.

### Western blotting

Cells were lysed in ice-cold whole-cell extract buffer (20 mM HEPES, 5 mM EDTA, 10 mM EGTA, 0.4 M KCl, 0.4% Triton X-100, 10% Glycerol, 5 mM NaF, 1 mM DTT, 5 μg/ml Leupeptin, 50 μg/ml PMSE, 1 mM Benzamide, 5 μg/ml Aprotinin, 1 mM Na<sub>2</sub>VO<sub>4</sub>) for 30 minutes on ice. Lysates were cleared by centrifugation at 15,000 g for 10 minutes and analyzed by SDS PAGE.

### Statistical analysis

The *P*-values were calculated using the Student's *t*-test.

### Acknowledgements

We thank D. Gillespie for helpful discussions. We also thank J. DeLuca, B. Orr, J. Swedlow and S. Taylor for generously sharing reagents.

### Author contributions

E.P. performed the experiments and analysed the results. G.Z. designed the experiments and wrote the paper.

### Funding

This work was funded by the Association for International Cancer Research.

Supplementary material available online at

<http://jcs.biologists.org/lookup/suppl/doi:10.1242/jcs.119677/-/DC1>

### References

- Abrieu, A., Magnaghi-Jaulin, L., Kahana, J. A., Peter, M., Castro, A., Vigneron, S., Lorca, T., Cleveland, D. W. and Labbé, J. C. (2001). Mps1 is a kinetochore-associated kinase essential for the vertebrate mitotic checkpoint. *Cell* **106**, 83–93.
- Akiyoshi, B., Sarangapani, K. K., Powers, A. F., Nelson, C. R., Reichow, S. L., Arellano-Santoyo, H., Gonen, T., Ranish, J. A., Asbury, C. L. and Biggins, S. (2010). Tension directly stabilizes reconstituted kinetochore-microtubule attachments. *Nature* **468**, 576–579.
- Andrews, P. D., Ovechkina, Y., Morrice, N., Wagenbach, M., Duncan, K., Wordeman, L. and Swedlow, J. R. (2004). Aurora B regulates MCAK at the mitotic centromere. *Dev. Cell* **6**, 253–268.
- Bakhom, S. F., Thompson, S. L., Manning, A. L. and Compton, D. A. (2009). Genome stability is ensured by temporal control of kinetochore-microtubule dynamics. *Nat. Cell Biol.* **11**, 27–35.
- Bourke, E., Dodson, H., Merdes, A., Cuffe, L., Zachos, G., Walker, M., Gillespie, D. and Morrison, C. G. (2007). DNA damage induces Chk1-dependent centrosome amplification. *EMBO Rep.* **8**, 603–609.
- Chan, Y. W., Jeyaprakash, A. A., Nigg, E. A. and Santamaria, A. (2012). Aurora B controls kinetochore-microtubule attachments by inhibiting Ska complex-KMN network interaction. *J. Cell Biol.* **196**, 563–571.
- Cheeseman, I. M., Anderson, S., Jwa, M., Green, E. M., Kang, J., Yates, J. R., Chan, C. S., Drubin, D. G. and Barnes, G. (2002). Phospho-regulation of kinetochore-microtubule attachments by the Aurora kinase Iplp. *Cell* **111**, 163–172.
- Cheeseman, I. M., Chappie, J. S., Wilson-Kubalek, E. M. and Desai, A. (2006). The conserved KMN network constitutes the core microtubule-binding site of the kinetochore. *Cell* **127**, 983–997.
- Cimini, D. (2008). Merotelic kinetochore orientation, aneuploidy, and cancer. *Biochim. Biophys. Acta* **1786**, 32–40.



- Cimini, D., Howell, B., Maddox, P., Khodjakov, A., Degraffi, F. and Salmon, E. D. (2001). Merotelic kinetochore orientation is a major mechanism of aneuploidy in mitotic mammalian tissue cells. *J. Cell Biol.* **153**, 517-528.
- Cimini, D., Moree, B., Canman, J. C. and Salmon, E. D. (2003). Merotelic kinetochore orientation occurs frequently during early mitosis in mammalian tissue cells and error correction is achieved by two different mechanisms. *J. Cell Sci.* **116**, 4213-4225.
- Cimini, D., Wan, X., Hirel, C. B. and Salmon, E. D. (2006). Aurora kinase promotes turnover of kinetochore microtubules to reduce chromosome segregation errors. *Curr. Biol.* **16**, 1711-1718.
- Cooke, C. A., Bernat, R. L. and Earnshaw, W. C. (1990). CENP-B: a major human centromere protein located beneath the kinetochore. *J. Cell Biol.* **110**, 1475-1488.
- DeLuca, J. G., Gall, W. E., Ciferri, C., Cimini, D., Musacchio, A. and Salmon, E. D. (2006). Kinetochore microtubule dynamics and attachment stability are regulated by Hec1. *Cell* **127**, 969-982.
- DeLuca, K. F., Lens, S. M. and DeLuca, J. G. (2011). Temporal changes in Hec1 phosphorylation control kinetochore-microtubule attachment stability during mitosis. *J. Cell Sci.* **124**, 622-634.
- Ditchfield, C., Johnson, V. L., Tighe, A., Ellston, R., Haworth, C., Johnson, T., Mortlock, A., Keen, N. and Taylor, S. S. (2003). Aurora B couples chromosome alignment with anaphase by targeting BubR1, Mad2, and Cenp-E to kinetochores. *J. Cell Biol.* **161**, 267-280.
- Elowe, S. (2011). Bub1 and BubR1: at the interface between chromosome attachment and the spindle checkpoint. *Mol. Cell Biol.* **31**, 3085-3093.
- Hardwick, K. G., Weiss, E., Luca, F. C., Winey, M. and Murray, A. W. (1996). Activation of the budding yeast spindle assembly checkpoint without mitotic spindle disruption. *Science* **273**, 953-956.
- Hauf, S., Cole, R. W., LaTerra, S., Zimmer, C., Schnapp, G., Walter, R., Heckel, A., van Meel, J., Rieder, C. L. and Peters, J. M. (2003). The small molecule Hesperadin reveals a role for Aurora B in correcting kinetochore-microtubule attachment and in maintaining the spindle assembly checkpoint. *J. Cell Biol.* **161**, 281-294.
- Hewitt, L., Tighe, A., Santaguida, S., White, A. M., Jones, C. D., Musacchio, A., Green, S. and Taylor, S. S. (2010). Sustained Mps1 activity is required in mitosis to recruit O-Mad2 to the Mad1-C-Mad2 core complex. *J. Cell Biol.* **190**, 25-34.
- Janssen, A., Kops, G. J. and Medema, R. H. (2009). Elevating the frequency of chromosome mis-segregation as a strategy to kill tumor cells. *Proc. Natl. Acad. Sci. USA* **106**, 19108-19113.
- Jelluma, N., Brenkman, A. B., McLeod, I., Yates, J. R., 3rd, Cleveland, D. W., Medema, R. H. and Kops, G. J. (2008a). Chromosomal instability by inefficient Mps1 auto-activation due to a weakened mitotic checkpoint and lagging chromosomes. *PLoS ONE* **3**, e2415.
- Jelluma, N., Brenkman, A. B., van den Broek, N. J., Cruikjens, C. W., van Osch, M. H., Lens, S. M., Medema, R. H. and Kops, G. J. (2008b). Mps1 phosphorylates Borealin to control Aurora B activity and chromosome alignment. *Cell* **132**, 233-246.
- Kemmler, S., Stach, M., Knapp, M., Ortiz, J., Pfannstiel, J., Ruppert, T. and Lechner, J. (2009). Mimicking Ndc80 phosphorylation triggers spindle assembly checkpoint signalling. *EMBO J.* **28**, 1099-1110.
- Kim, Y., Holland, A. J., Lan, W. and Cleveland, D. W. (2010). Aurora kinases and protein phosphatase 1 mediate chromosome congression through regulation of CENP-E. *Cell* **142**, 444-455.
- Kline-Smith, S. L., Khodjakov, A., Hergert, P. and Walczak, C. E. (2004). Depletion of centromeric MCAK leads to chromosome congression and segregation defects due to improper kinetochore attachments. *Mol. Biol. Cell* **15**, 1146-1159.
- Knowlton, A. L., Lan, W. and Stukenberg, P. T. (2006). Aurora B is enriched at merotelic attachment sites, where it regulates MCAK. *Curr. Biol.* **16**, 1705-1710.
- Kops, G. J., Weaver, B. A. and Cleveland, D. W. (2005). On the road to cancer: aneuploidy and the mitotic checkpoint. *Nat. Rev. Cancer* **5**, 773-785.
- Lan, W., Zhang, X., Kline-Smith, S. L., Rosasco, S. E., Barrett-Wilt, G. A., Shabanowitz, J., Hunt, D. F., Walczak, C. E. and Stukenberg, P. T. (2004). Aurora B phosphorylates centromeric MCAK and regulates its localization and microtubule depolymerization activity. *Curr. Biol.* **14**, 273-286.
- Liu, X. and Winey, M. (2012). The MPS1 family of protein kinases. *Annu. Rev. Biochem.* **81**, 561-585.
- Liu, D., Vader, G., Vromans, M. J., Lampson, M. A. and Lens, S. M. (2009). Sensing chromosome bi-orientation by spatial separation of aurora B kinase from kinetochore substrates. *Science* **323**, 1350-1353.
- Maciejowski, J., George, K. A., Terret, M. E., Zhang, C., Shokat, K. M. and Jallepalli, P. V. (2010). Mps1 directs the assembly of Cdc20 inhibitory complexes during interphase and mitosis to control M phase timing and spindle checkpoint signaling. *J. Cell Biol.* **190**, 89-100.
- Maldonado, M. and Kapoor, T. M. (2011). Constitutive Mad1 targeting to kinetochores uncouples checkpoint signalling from chromosome biorientation. *Nat. Cell Biol.* **13**, 475-482.
- Manning, A. L., Ganem, N. J., Bakhom, S. F., Wagenbach, M., Wordeman, L. and Compton, D. A. (2007). The kinesin-13 proteins Kif2a, Kif2b, and Kif2c/MCAK have distinct roles during mitosis in human cells. *Mol. Biol. Cell* **18**, 2970-2979.
- Manning, A. L., Bakhom, S. F., Maffini, S., Correia-Melo, C., Maiato, H. and Compton, D. A. (2010). CLASP1, astrin and Kif2b form a molecular switch that regulates kinetochore-microtubule dynamics to promote mitotic progression and fidelity. *EMBO J.* **29**, 3531-3543.
- Peddibhotla, S., Lam, M. H., Gonzalez-Rimbau, M. and Rosen, J. M. (2009). The DNA-damage effector checkpoint kinase 1 is essential for chromosome segregation and cytokinesis. *Proc. Natl. Acad. Sci. USA* **106**, 5159-5164.
- Petsalaki, E., Akoumianaki, T., Black, E. J., Gillespie, D. A. and Zachos, G. (2011). Phosphorylation at serine 331 is required for Aurora B activation. *J. Cell Biol.* **195**, 449-466.
- Pinsky, B. A., Kung, C., Shokat, K. M. and Biggins, S. (2006). The Ipl1-Aurora protein kinase activates the spindle checkpoint by creating unattached kinetochores. *Nat. Cell Biol.* **8**, 78-83.
- Pinsky, B. A., Nelson, C. R. and Biggins, S. (2009). Protein phosphatase 1 regulates exit from the spindle checkpoint in budding yeast. *Curr. Biol.* **19**, 1182-1187.
- Posch, M., Khoudoli, G. A., Swift, S., King, E. M., Deluca, J. G. and Swedlow, J. R. (2010). Sds22 regulates aurora B activity and microtubule-kinetochore interactions at mitosis. *J. Cell Biol.* **191**, 61-74.
- Santaguida, S., Tighe, A., D'Alise, A. M., Taylor, S. S. and Musacchio, A. (2010). Dissecting the role of MPS1 in chromosome biorientation and the spindle checkpoint through the small molecule inhibitor reversine. *J. Cell Biol.* **190**, 73-87.
- Santaguida, S., Vernieri, C., Villa, F., Ciliberto, A. and Musacchio, A. (2011). Evidence that Aurora B is implicated in spindle checkpoint signalling independently of error correction. *EMBO J.* **30**, 1508-1519.
- Saurin, A. T., van der Waal, M. S., Medema, R. H., Lens, S. M. and Kops, G. J. (2011). Aurora B potentiates Mps1 activation to ensure rapid checkpoint establishment at the onset of mitosis. *Nat. Commun.* **2**, 316.
- Schiff, P. B. and Horwitz, S. B. (1980). Taxol stabilizes microtubules in mouse fibroblast cells. *Proc. Natl. Acad. Sci. USA* **77**, 1561-1565.
- Schmidt, M., Budirahardja, Y., Klompaker, R. and Medema, R. H. (2005). Ablation of the spindle assembly checkpoint by a compound targeting Mps1. *EMBO Rep.* **6**, 866-872.
- Schmidt, J. C., Kiyomitsu, T., Hori, T., Backer, C. B., Fukagawa, T. and Cheeseman, I. M. (2010). Aurora B kinase controls the targeting of the Astrin-SKAP complex to bioriented kinetochores. *J. Cell Biol.* **191**, 269-280.
- Silkworth, W. T., Nardi, I. K., Scholl, L. M. and Cimini, D. (2009). Multipolar spindle pole coalescence is a major source of kinetochore mis-attachment and chromosome mis-segregation in cancer cells. *PLoS ONE* **4**, e6564.
- Slidrecht, T., Zhang, C., Shokat, K. M. and Kops, G. J. (2010). Chemical genetic inhibition of Mps1 in stable human cell lines reveals novel aspects of Mps1 function in mitosis. *PLoS ONE* **5**, e10251.
- Smith, J., Tho, L. M., Xu, N. and Gillespie, D. A. (2010). The ATM-Chk2 and ATR-Chk1 pathways in DNA damage signaling and cancer. *Adv. Cancer Res.* **108**, 73-112.
- Stucke, V. M., Siljé, H. H., Arnaud, L. and Nigg, E. A. (2002). Human Mps1 kinase is required for the spindle assembly checkpoint but not for centrosome duplication. *EMBO J.* **21**, 1723-1732.
- Tanaka, K. (2013). Regulatory mechanisms of kinetochore-microtubule interaction in mitosis. *Cell. Mol. Life Sci.* **70**, 559-579.
- Tanenbaum, M. E., Macurek, L., van der Vaart, B., Galli, M., Akhmanova, A. and Medema, R. H. (2011). A complex of Kif18b and MCAK promotes microtubule depolymerization and is negatively regulated by Aurora kinases. *Curr. Biol.* **21**, 1356-1365.
- Tighe, A., Staples, O. and Taylor, S. (2008). Mps1 kinase activity restrains anaphase during an unperturbed mitosis and targets Mad2 to kinetochores. *J. Cell Biol.* **181**, 893-901.
- Vader, G., Medema, R. H. and Lens, S. M. (2006). The chromosomal passenger complex: guiding Aurora-B through mitosis. *J. Cell Biol.* **173**, 833-837.
- van der Waal, M. S., Hengeveld, R. C., van der Horst, A. and Lens, S. M. (2012a). Cell division control by the Chromosomal Passenger Complex. *Exp. Cell Res.* **318**, 1407-1420.
- van der Waal, M. S., Saurin, A. T., Vromans, M. J., Vleugel, M., Wurzenberger, C., Gerlich, D. W., Medema, R. H., Kops, G. J. and Lens, S. M. (2012b). Mps1 promotes rapid centromere accumulation of Aurora B. *EMBO Rep.* **13**, 847-854.
- Vanoosthuyse, V. and Hardwick, K. G. (2009). A novel protein phosphatase 1-dependent spindle checkpoint silencing mechanism. *Curr. Biol.* **19**, 1176-1181.
- Wang, E., Ballister, E. R. and Lampson, M. A. (2011). Aurora B dynamics at centromeres create a diffusion-based phosphorylation gradient. *J. Cell Biol.* **194**, 539-549.
- Yang, Z., Kenny, A. E., Brito, D. A. and Rieder, C. L. (2009). Cells satisfy the mitotic checkpoint in Taxol, and do so faster in concentrations that stabilize syntelic attachments. *J. Cell Biol.* **186**, 675-684.
- Zachos, G., Rainey, M. D. and Gillespie, D. A. (2003). Chk1-deficient tumour cells are viable but exhibit multiple checkpoint and survival defects. *EMBO J.* **22**, 713-723.
- Zachos, G., Black, E. J., Walker, M., Scott, M. T., Vagnarelli, P., Earnshaw, W. C. and Gillespie, D. A. (2007). Chk1 is required for spindle checkpoint function. *Dev. Cell* **12**, 247-260.
